# Supplementary material for: Clinical Implications of Lysyl Oxidase-Like Protein 2 Expression in Pancreatic Cancer
Source: PubMed Central journal article supplement (PMC6026164; doi:10.1038/s41598-018-28253-9), 2018-06-29

## Supplementary materials

### Clinical Implications of Lysyl Oxidase-Like Protein 2 Expression in Pancreatic Cancer

#### Authors:

Nobutake Tanaka, MD<sup>1</sup>; Suguru Yamada, MD, PhD<sup>1\*</sup>; Fuminori Sonohara, MD, PhD<sup>1</sup>; Masaya Suenaga, MD, PhD<sup>1</sup>; Masamichi Hayashi, MD, PhD<sup>1</sup>; Hideki Takami, MD, PhD<sup>1</sup>; Yukiko Niwa, MD, PhD<sup>1</sup>; Norifumi Hattori, MD, PhD<sup>1</sup>; Naoki Iwata, MD, PhD<sup>1</sup>; Mitsuro Kanda, MD, PhD<sup>1</sup>; Chie Tanaka, MD, PhD<sup>1</sup>; Daisuke Kobayashi, MD, PhD<sup>1</sup>; Goro Nakayama, MD, PhD<sup>1</sup>; Masahiko Koike, MD, PhD<sup>1</sup>; Michitaka Fujiwara, MD, PhD<sup>1</sup>; Tsutomu Fujii, MD, PhD<sup>2</sup>; and Yasuhiro Kodera, MD, PhD<sup>1</sup>

#### Contents:

**Supplementary table S1.** Primer sets designed for RT-PCR assay in this study

**Supplementary table S2.** The grading of staining range and staining concentration.

**Supplementary figure S1.** *Lox* family gene, E-cadherin and Vimentin expression was examined in pancreatic cancer cell lines by RT-PCR. *LOXL2* expression was correlated with EMT status.

**Supplementary figure S2.** Survival analysis stratified by *LOX* family gene levels in pancreatic cancer (PC) cases from The Cancer Genome Atlas datasets. (A) Kaplan-Meier Analysis for recurrence-free survival (RFS) stratified by *LOX* expression. (B) Kaplan-Meier Analysis for OS stratified by *LOX* expression. (C) Kaplan-Meier Analysis for RFS stratified by *LOXL1* expression. (D) Kaplan-Meier Analysis for OS stratified by *LOXL1* expression. (E) Kaplan-Meier Analysis for RFS stratified by *LOXL3* expression. (F) Kaplan-Meier Analysis for OS stratified by *LOXL3* expression. (G) Kaplan-Meier Analysis for RFS stratified by *LOXL4* expression. (H) Kaplan-Meier Analysis for OS stratified by *LOXL4* expression.

**Supplementary table S1.** Primer sets designed for RT- PCR assay in this study

| Primer  | Sequence                   | Genome position | Length (bp) |
|---------|----------------------------|-----------------|-------------|
| LOX_F   | GCGGCGGAGGAAAACCTGT        | 964-981         | 19          |
| LOX_R   | AGCAGCACCCCTGTGATCATAATC   | 1015-1037       | 24          |
| LOXL1_F | GACTGCCAGTGGATCGACATAA     | 1875-1896       | 22          |
| LOXL1_R | CTCCAAAACAATATACTTTGGGTTCA | 1936-1961       | 26          |
| LOXL2_F | CTCCCAGATCCACAACAATGG      | 2139-2159       | 21          |
| LOXL2_R | AGCAGGTCATAGTGGGTGAACA     | 2240-2261       | 22          |
| LOXL3_F | TGCAAATATGATGGACATAGAATCTG | 1809-1834       | 26          |
| LOXL3_R | CAAACCTCCTGTTGGCCTCTT      | 1870-1890       | 21          |
| LOXL4_F | GGGCCCCGGGAATTATATCT       | 2215-2234       | 20          |
| LOXL4_R | GCATATTGTTGGAGAAATCTGACTCT | 2269-2294       | 26          |
| GAPDH_F | GAAGGTGAAGGTCGGAGTC        | 19-40           | 19          |
| GAPDH_R | GAAGATGGTGATGGGATTC        | 69-94           | 20          |

**Supplementary table S2.** The grading of staining range and staining concentration.

| Grade                  | 3                                  | 2                                   | 1                            |
|------------------------|------------------------------------|-------------------------------------|------------------------------|
| Staining range         | More than 50% of the field of view | From more than 20% to less than 50% | No staining or less than 20% |
| Staining concentration | High                               | Intermediate                        | Non or weak                  |

# Supplementary figure S1

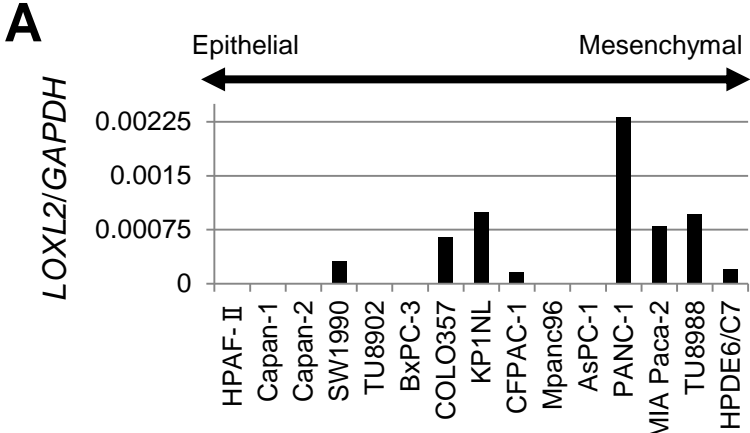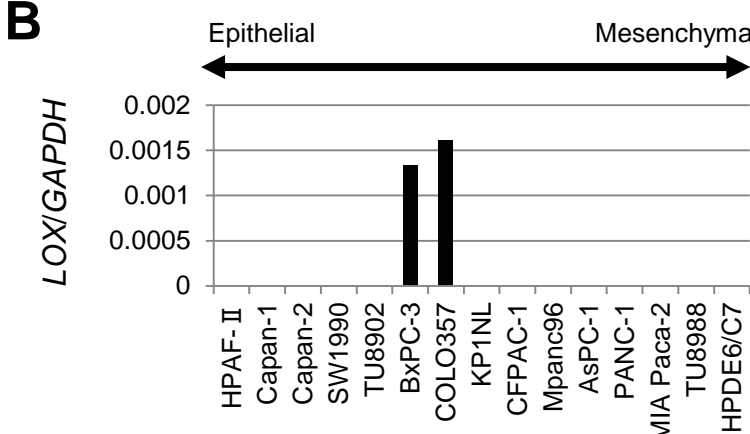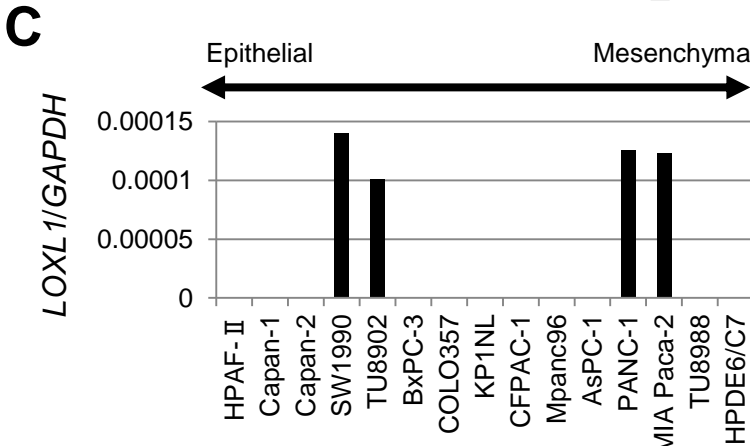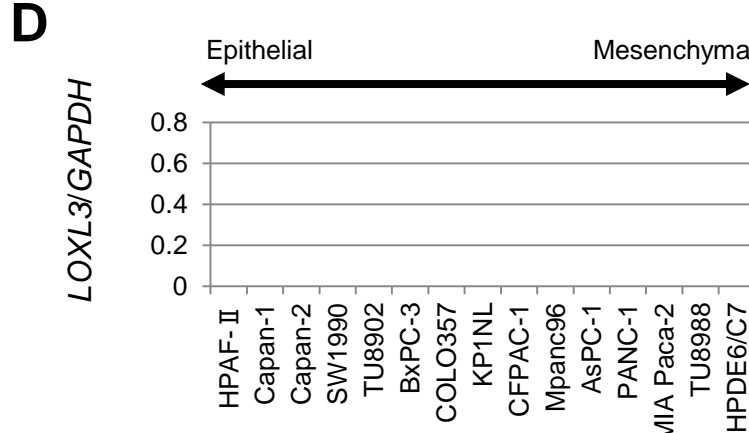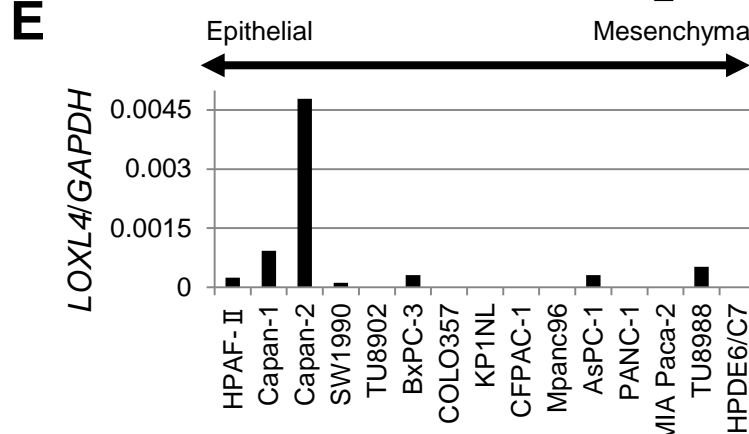

# Supplementary figure S2

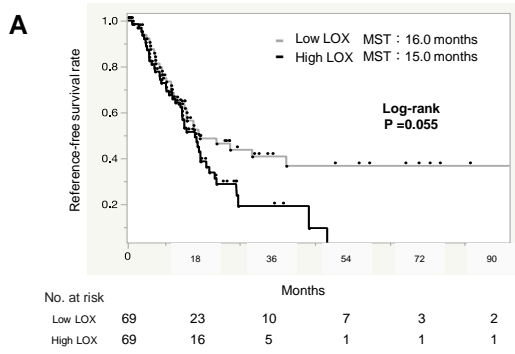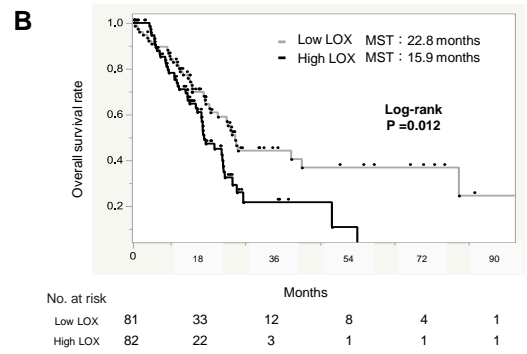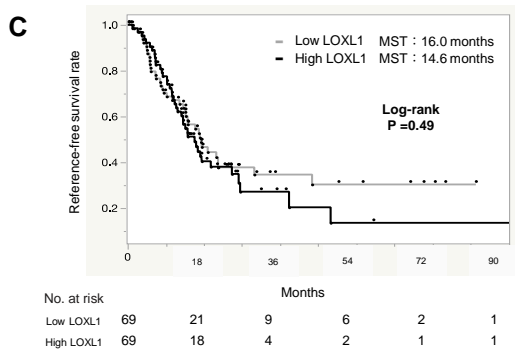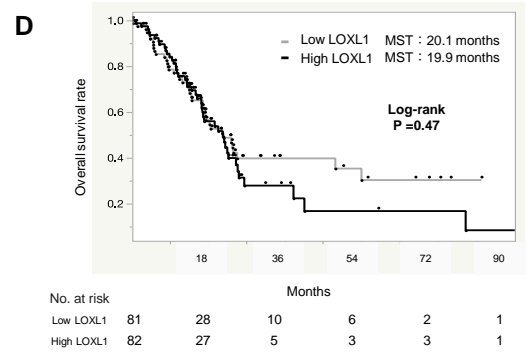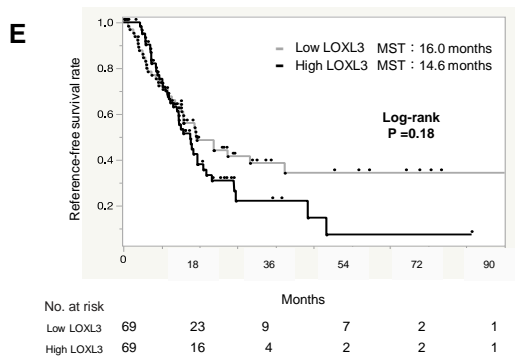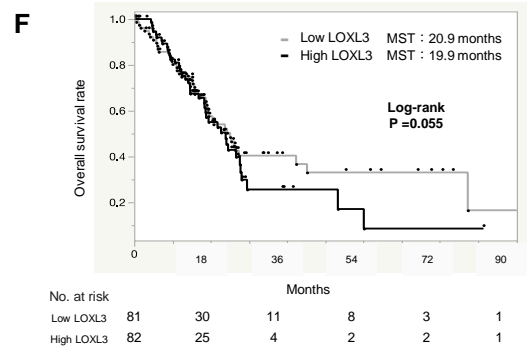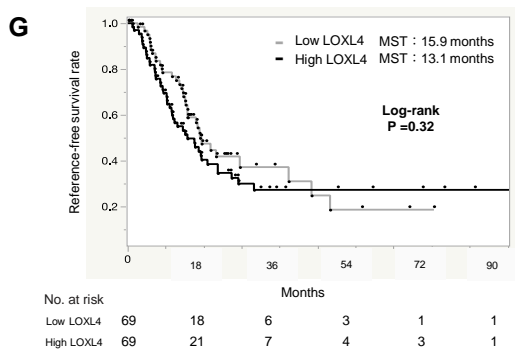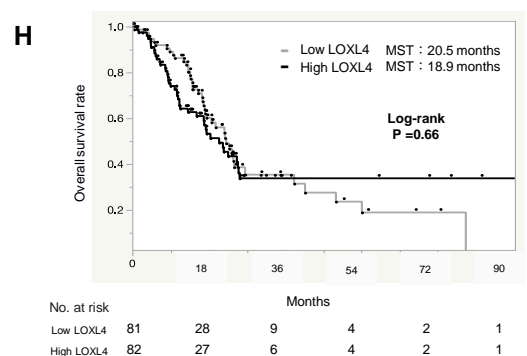

Supplement: 41598_2018_28253_MOESM1_ESM.pdf [file 41598_2018_28253_MOESM1_ESM.pdf]
